# Supplementary material for: Evolution of Tertiary Structure of Viral RNA Dependent Polymerases
Source: PubMed Central journal article supplement (PMC4015915; doi:10.1371/journal.pone.0096070), 2014-05-09

DENV3

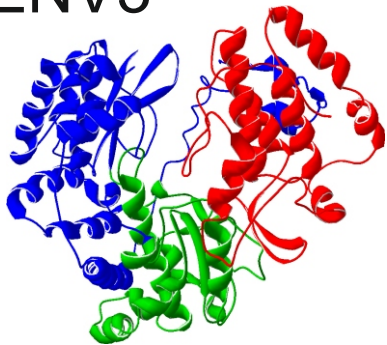

JEV

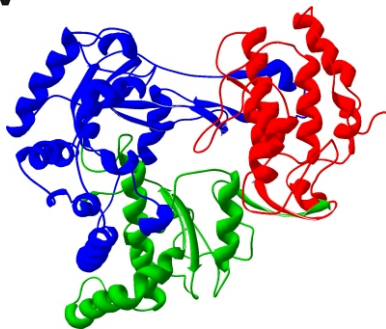

HCV

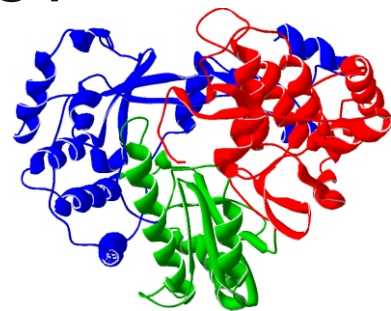

BVDV

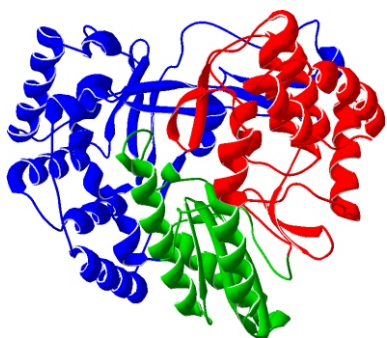

PoIV1

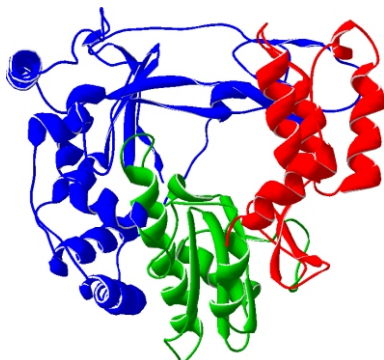

HuRV16

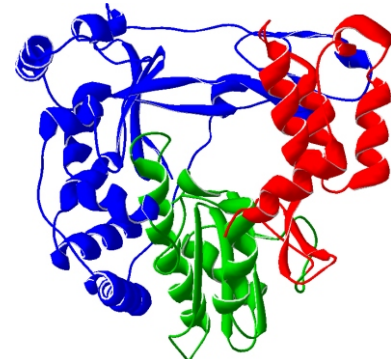

HuRV1B

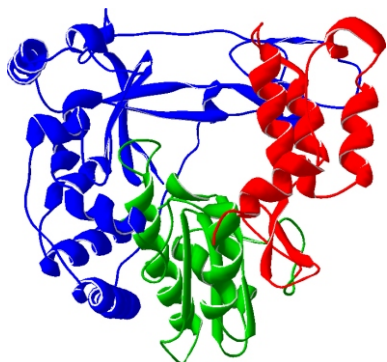

CoxVB3

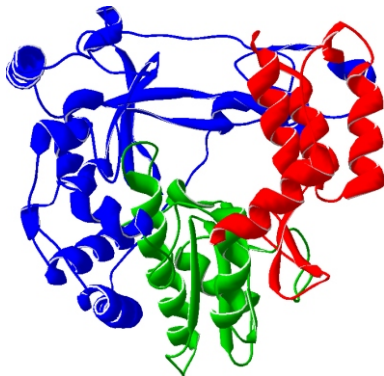

FMDV

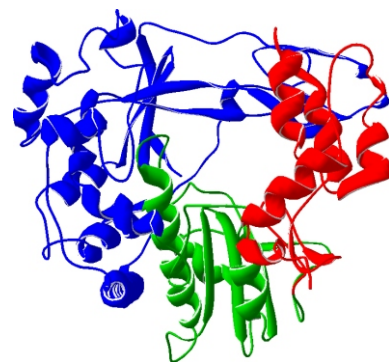

NORV

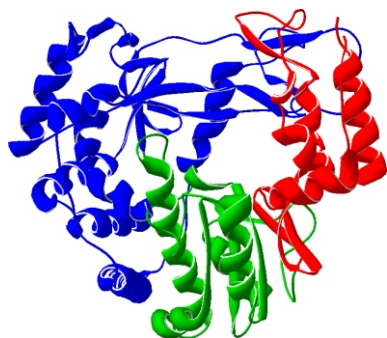

MuNORV1

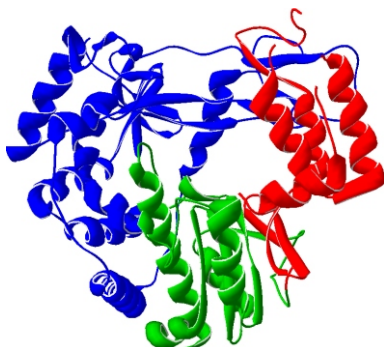

RHDV

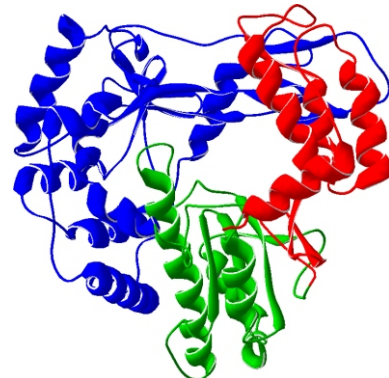

Supplement: pone.0096070.s002.pdf [file pone.0096070.s002.pdf]
